# Supplementary material
Source: Frontiers journal article supplement (https://www.frontiersin.org/articles/205963)
Supplement: Data_Sheet_2.XLS [file Data_Sheet_2.XLS]

## Sheet: methylation increasing
ID	Chromosome	Description
LOC_Os01g25386	chr1	multidrug resistance-associated protein, putative, expressed
LOC_Os10g41900	chr10	Os10g0568600//NB-ARC domain containing protein//mla1, putative
LOC_Os01g62750	chr1	Nucleic acid-binding, OB-fold domain containing protein.//Os01g0846000//expressed protein
LOC_Os10g36780	chr10	Peptidase S28 family protein.//Os10g0511600//Os10g0511600 protein//OsProCP4 - Putative Lysosomal Pro-x Carboxypeptidase homologue, expressed
LOC_Os01g69850	chr1	Similar to MADS-box protein PTM5.//Os01g0922800//MADS box-like protein//OsMADS65 - MADS-box family gene with MIKC* type-box, expressed
LOC_Os10g08540	chr10	Similar to Cytochrome P450 CYP76H18.//Similar to Cytochrome P450 family protein.//Os10g0167200//Os10g0167200 protein//cytochrome P450, putative, expressed
LOC_Os07g46900	chr7	Hypothetical conserved gene.//Os07g0664100//Os07g0664100 protein//transposon protein, putative, unclassified, expressed
LOC_Os01g24420	chr1	expressed protein
LOC_Os06g37400	chr6	retrotransposon protein, putative, unclassified
LOC_Os04g04390	chr4	Hypothetical protein.//Os04g0132900//retrotransposon protein, putative, unclassified, expressed
LOC_Os05g27080	chr5	Hypothetical conserved gene.//Os05g0337100//retrotransposon protein, putative, unclassified
LOC_Os05g10660	chr5	transposon protein, putative, CACTA, En/Spm sub-class
LOC_Os03g36239	chr3	Retrotransposon protein, putative, Ty3-gypsy subclass, expressed//retrotransposon protein, putative, Ty3-gypsy subclass
LOC_Os11g15010	chr11	Zinc finger, SWIM-type domain containing protein.//Os11g0256400//Os11g0256400 protein//transposon protein, putative, Mutator sub-class, expressed
LOC_Os09g36340	chr9	HVA22, putative, expressed
LOC_Os05g08790	chr5	Ribosomal protein L5 domain containing protein.//Os05g0180400//MAR-binding filament-like protein 1, putative, expressed
LOC_Os06g06850	chr6	Non-protein coding transcript.//Hypothetical conserved gene.//Os06g0163800//Os06g0163800 protein//resistance protein LR10, putative, expressed
LOC_Os01g19920	chr1	retrotransposon protein, putative, unclassified
LOC_Os11g10090	chr11	transposon protein, putative, CACTA, En/Spm sub-class, expressed
LOC_Os12g21784	chr12	Similar to Protein kinase (EC 2.7.1.37).//Hypothetical conserved gene.//Os12g0406000//expressed protein
LOC_Os05g32474	chr5	Conserved hypothetical protein.//Hypothetical conserved gene.//Os05g0391000//expressed protein//transposon protein, putative, unclassified
LOC_Os03g39362	chr3	retrotransposon protein, putative, unclassified
LOC_Os06g05230	chr6	retrotransposon protein, putative, unclassified
LOC_Os10g33020	chr10	hypothetical protein
LOC_Os11g35580	chr11	Similar to NB-ARC domain containing protein.//Os11g0560000//NB-ARC domain containing protein//disease resistance protein RPM1, putative, expressed
LOC_Os12g19040	chr12	Conserved hypothetical protein.//Os12g0288600//expressed protein
LOC_Os05g15270	chr5	retrotransposon protein, putative, Ty3-gypsy subclass
LOC_Os01g11110	chr1	Similar to 14-3-3 protein 7.//Os01g0209200//Os01g0209200 protein//14-3-3-like protein GF14-G//14-3-3 protein, putative, expressed
LOC_Os10g24710	chr10	retrotransposon protein, putative, Ty3-gypsy subclass
LOC_Os02g36264	chr2	Terpene synthase-like domain containing protein.//Os02g0571800//Ent-isokaur-15-ene synthase//terpene synthase, putative, expressed
LOC_Os03g61630	chr3	Similar to Sec13p.//Os03g0831800//WD domain, G-beta repeat domain containing protein, expressed
LOC_Os10g15390	chr10	GTP-binding signal recognition particle SRP54, G-domain containing protein.//Os10g0214400//ribosomal protein S7, putative, expressed
LOC_Os11g08610	chr11	Retrotransposon protein, putative, unclassified//retrotransposon protein, putative, unclassified
LOC_Os06g29340	chr6	retrotransposon protein, putative, unclassified, expressed
LOC_Os09g18240	chr9	retrotransposon protein, putative, unclassified
LOC_Os05g10620	chr5	Similar to ANAC075.//Os05g0194500//Os05g0194500 protein//no apical meristem protein, putative, expressed
LOC_Os05g15370	chr5	Similar to 50S ribosomal protein L13.//Os05g0243300//Os05g0243300 protein//ribosomal protein L13, putative, expressed
LOC_Os01g62100	chr1	Nucleic acid-binding, OB-fold domain containing protein.//Os01g0838100//Os01g0838100 protein//retrotransposon protein, putative, unclassified
LOC_Os04g17560	chr4	retrotransposon protein, putative, unclassified
LOC_Os12g24690	chr12	Retrotransposon protein, putative, Ty1-copia subclass//retrotransposon protein, putative, Ty1-copia subclass
LOC_Os10g08720	chr10	hypothetical protein
LOC_Os06g11330	chr6	Similar to Transcription factor MADS55.//Os06g0217300//Os06g0217300 protein//MADS-box transcription factor 55//OsMADS55 - MADS-box family gene with MIKCc type-box, expressed
LOC_Os02g15140	chr2	Hypothetical protein.//Os02g0249500//retrotransposon protein, putative, unclassified, expressed
LOC_Os01g39890	chr1	Hypothetical conserved gene.//Os01g0580800//transposon protein, putative, unclassified, expressed
LOC_Os11g19030	chr11	Putative uncharacterized protein//FAR1 family protein
LOC_Os11g29180	chr11	Retrotransposon protein, putative, unclassified//retrotransposon protein, putative, unclassified
LOC_Os02g49200	chr2	hypothetical protein
LOC_Os05g11720	chr5	Zinc finger, RING/FYVE/PHD-type domain containing protein.//Os05g0207400//Os05g0207400 protein//zinc finger, C3HC4 type domain containing protein, expressed
LOC_Os09g32090	chr9	Similar to Methyl-binding domain protein MBD111.//Similar to Methyl-CpG-binding domain protein 1 (Methyl-CpG binding protein MBD1).//Os09g0494300//Os09g0494300 protein//methyl-binding domain protein MBD, putative, expressed
LOC_Os06g40800	chr6	hypothetical protein
LOC_Os03g39760	chr3	Cytochrome P450 family protein.//Os03g0594900//Cytochrome P450 family protein, expressed//cytochrome P450, putative, expressed
LOC_Os01g48150	chr1	expressed protein
LOC_Os05g44370	chr5	conserved hypothetical protein
LOC_Os04g50900	chr4	conserved hypothetical protein
LOC_Os05g20310	chr5	retrotransposon protein, putative, Ty3-gypsy subclass
LOC_Os06g34680	chr6	retrotransposon protein, putative, unclassified
LOC_Os06g12640	chr6	Similar to SWIM zinc finger family protein.//Os06g0232700//transposon protein, putative, unclassified, expressed
LOC_Os05g13590	chr5	hypothetical protein
LOC_Os01g31270	chr1	annexin, putative
LOC_Os05g15930	chr5	transposon protein, putative, unclassified
LOC_Os10g13470	chr10	retrotransposon protein, putative, Ty3-gypsy subclass
LOC_Os12g04110	chr12	Hypothetical conserved gene.//Similar to Cytochrome P450 family protein.//protein coding//pentatricopeptide, putative
LOC_Os01g32700	chr1	transposon protein, putative, unclassified
LOC_Os05g28550	chr5	retrotransposon protein, putative, Ty3-gypsy subclass
LOC_Os07g31800	chr7	Similar to NB-ARC domain containing protein.//Os07g0501500//Os07g0501500 protein//NB-ARC domain containing protein, expressed
LOC_Os02g21009	chr2	Sodium/calcium exchanger membrane region domain containing protein.//Os02g0314100//Vacuolar cation/proton exchanger 1c//sodium/calcium exchanger protein, putative, expressed
LOC_Os01g61110	chr1	Conserved hypothetical protein.//Os01g0826800//ulp1 protease family, C-terminal catalytic domain containing protein
LOC_Os04g05430	chr4	retrotransposon protein, putative, Ty1-copia subclass, expressed
LOC_Os08g18170	chr8	hypothetical protein
LOC_Os09g20410	chr9	hypothetical protein
LOC_Os01g44200	chr1	Conserved hypothetical protein.//Hypothetical gene.//Os01g0632700//retrotransposon protein, putative, unclassified
LOC_Os11g40860	chr11	retrotransposon protein, putative, unclassified
LOC_Os09g02900	chr9	transposon protein, putative, unclassified
LOC_Os01g37580	chr1	retrotransposon protein, putative, unclassified
LOC_Os02g24240	chr2	hypothetical protein
LOC_Os01g08390	chr1	hypothetical protein
LOC_Os06g30940	chr6	Pentatricopeptide repeat domain containing protein.//Os06g0506100//Os06g0506100 protein//pentatricopeptide, putative, expressed
LOC_Os11g35740	chr11	retrotransposon protein, putative, Ty1-copia subclass
LOC_Os03g24230	chr3	conserved hypothetical protein
LOC_Os10g06860	chr10	FAR1 family protein
LOC_Os02g26630	chr2	transposon protein, putative, unclassified
LOC_Os06g45170	chr6	retrotransposon protein, putative, unclassified
LOC_Os12g22450	chr12	retrotransposon protein, putative, Ty3-gypsy subclass
LOC_Os02g15910	chr2	hypothetical protein
LOC_Os08g25880	chr8	retrotransposon protein, putative, unclassified
LOC_Os08g17560	chr8	hypothetical protein
LOC_Os02g19880	chr2	conserved hypothetical protein

## Sheet: methylation decreasing
ID	Chromosome	Description
LOC_Os09g14160	chr9	transposon protein, putative, Mutator sub-class
LOC_Os08g04270	chr8	Similar to Fertilization-independent endosperm protein 2 (Fragment).//Os08g0137100//WD domain, G-beta repeat domain containing protein, expressed
LOC_Os12g15620	chr12	retrotransposon protein, putative, unclassified
LOC_Os12g10710	chr12	Similar to NB-ARC domain containing protein, expressed.//Hypothetical protein.//Os12g0209800
LOC_Os10g42364	chr10	Retrotransposon protein, putative, Ty3-gypsy subclass//retrotransposon protein, putative, Ty3-gypsy subclass
LOC_Os12g14699	chr12	Protein kinase, core domain containing protein.//Os12g0249900//Os12g0249900 protein//protein kinase domain containing protein, expressed
LOC_Os10g18400	chr10	Glycoside hydrolase, family 35 protein.//Os10g0330600//Beta-galactosidase 13//beta-galactosidase precursor, putative, expressed
LOC_Os09g15380	chr9	retrotransposon protein, putative, unclassified
LOC_Os05g20830	chr5	retrotransposon protein, putative, unclassified
LOC_Os01g27430	chr1	retrotransposon protein, putative, unclassified
LOC_Os09g14200	chr9	retrotransposon protein, putative, unclassified
LOC_Os10g01680	chr10	Putative hsr201 hypersensitivity-related protein//transferase family protein, putative
LOC_Os09g08940	chr9	transposon protein, putative, CACTA, En/Spm sub-class
LOC_Os01g26060	chr1	hypothetical protein
LOC_Os09g14260	chr9	transposon protein, putative, CACTA, En/Spm sub-class
LOC_Os12g14650	chr12	transposon protein, putative, CACTA, En/Spm sub-class
LOC_Os01g25630	chr1	Similar to Powdery mildew resistance protein PM3b.//Os01g0358700//Os01g0358700 protein//NB-ARC domain containing protein, expressed
LOC_Os12g14630	chr12	Retrotransposon protein, putative, LINE subclass//retrotransposon protein, putative, LINE subclass
LOC_Os09g14250	chr9	transposon protein, putative, Pong sub-class
LOC_Os09g08910	chr9	ATP synthase, putative, expressed
LOC_Os03g41438	chr3	Similar to Protein zx.//Os03g0610800//cDNA clone:002-125-A07, full insert sequence//Serpin-ZXB//serpin domain containing protein, putative, expressed
LOC_Os09g11980	chr9	retrotransposon protein, putative, Ty1-copia subclass
LOC_Os03g63360	chr3	Conserved hypothetical protein.//Os03g0850600//glutathione S-transferase, putative, expressed
LOC_Os10g08230	chr10	Similar to Cytochrome P450 family protein.//Cytochrome P450 family protein//retrotransposon, putative, centromere-specific
LOC_Os12g16310	chr12	retrotransposon, putative, centromere-specific
LOC_Os03g47120	chr3	Similar to PGPS/D5 (Fragment).//Os03g0674300//CBS domain containing protein, expressed
LOC_Os09g03860	chr9	retrotransposon protein, putative, unclassified
LOC_Os12g41600	chr12	Hypothetical protein.//Os12g0609600//OsSAUR57 - Auxin-responsive SAUR gene family member, expressed
LOC_Os05g25540	chr5	Similar to Protein kinase-like protein (Fragment).//Os05g0319700//Os05g0319700 protein//STRUBBELIG-RECEPTOR FAMILY 6 precursor, putative, expressed
LOC_Os05g20880	chr5	retrotransposon, putative, centromere-specific
LOC_Os05g13750	chr5	retrotransposon protein, putative, unclassified
LOC_Os10g08530	chr10	hypothetical protein
LOC_Os01g41360	chr1	expressed protein
LOC_Os05g22550	chr5	retrotransposon protein, putative, Ty3-gypsy subclass
LOC_Os09g09600	chr9	conserved hypothetical protein
LOC_Os10g33510	chr10	hypothetical protein
LOC_Os12g42640	chr12	Conserved hypothetical protein.//Hypothetical conserved gene.//Os12g0621300//transposon protein, putative, Mutator sub-class//retrotransposon protein, putative, Ty3-gypsy subclass
LOC_Os03g62270	chr3	Multi antimicrobial extrusion protein MatE family protein.//Os03g0839200//Os03g0839200 protein//MATE efflux family protein, putative, expressed
LOC_Os09g09770	chr9	retrotransposon protein, putative, Ty3-gypsy subclass
LOC_Os09g14110	chr9	retrotransposon protein, putative, unclassified
LOC_Os06g37460	chr6	retrotransposon protein, putative, unclassified
LOC_Os05g06980	chr5	Conserved hypothetical protein.//Os05g0162200//expressed protein
LOC_Os04g05900	chr4	retrotransposon protein, putative, Ty3-gypsy subclass
LOC_Os09g04960	chr9	Hypothetical conserved gene.//Os09g0135100//retrotransposon protein, putative, unclassified
LOC_Os12g20350	chr12	retrotransposon protein, putative, unclassified
LOC_Os05g21200	chr5	retrotransposon, putative, centromere-specific
LOC_Os08g02880	chr8	Conserved hypothetical protein.//Os08g0122400//CXXXC11 - Cysteine-rich protein with paired CXXXC motifs precursor, expressed
LOC_Os01g57160	chr1	transposon protein, putative, CACTA, En/Spm sub-class
LOC_Os10g01530	chr10	Similar to Helix-loop-helix DNA-binding domain containing protein.//Helix-loop-helix DNA-binding domain containing protein//helix-loop-helix DNA-binding domain containing protein, expressed
LOC_Os12g24320	chr12	ATPase, AAA-type, core domain containing protein.//Os12g0431100//Os12g0431100 protein//ATPase 3, putative, expressed
LOC_Os12g31960	chr12	Retrotransposon protein, putative, LINE subclass//retrotransposon protein, putative, LINE subclass
LOC_Os05g13700	chr5	retrotransposon protein, putative, unclassified
LOC_Os06g35860	chr6	hypothetical protein
LOC_Os01g36280	chr1	transposon protein, putative, CACTA, En/Spm sub-class
LOC_Os08g03930	chr8	retrotransposon protein, putative, unclassified
LOC_Os12g15660	chr12	retrotransposon protein, putative, unclassified
LOC_Os03g38240	chr3	hypothetical protein
LOC_Os10g42999	chr10	Retrotransposon protein, putative, Ty3-gypsy subclass//retrotransposon protein, putative, Ty3-gypsy subclass
LOC_Os05g34390	chr5	protein kinase domain containing protein
LOC_Os03g39650	chr3	Similar to Cytochrome P450 family protein, expressed.//Os03g0593600//Cytochrome P450, putative//cytochrome P450, putative, expressed
LOC_Os05g04780	chr5	retrotransposon protein, putative, Ty1-copia subclass
LOC_Os05g31600	chr5	Polynucleotidyl transferase, Ribonuclease H fold domain containing protein.//Os05g0380700//retrotransposon protein, putative, Ty1-copia subclass, expressed
LOC_Os09g11720	chr9	hypothetical protein
LOC_Os03g39730	chr3	retrotransposon protein, putative, Ty3-gypsy subclass
LOC_Os05g20090	chr5	retrotransposon protein, putative, unclassified
LOC_Os12g14680	chr12	retrotransposon protein, putative, Ty1-copia subclass
LOC_Os09g09960	chr9	retrotransposon protein, putative, Ty3-gypsy subclass
LOC_Os06g04200	chr6	Granule-bound starch synthase I, chloroplast precursor (EC 2.4.1.21).//Os06g0133000//Glutinous endosperm 1//Granule-bound starch synthase 1, chloroplastic/amyloplastic//starch synthase, putative, expressed
LOC_Os08g03940	chr8	retrotransposon protein, putative, unclassified
LOC_Os09g32580	chr9	Similar to OSIGBa0158F13.3 protein.//Os09g0502600//expressed protein
LOC_Os03g52100	chr3	retrotransposon protein, putative, Ty3-gypsy subclass
LOC_Os08g03650	chr8	BTB domain containing protein.//Os08g0130600//Os08g0130600 protein//BTBN17 - Bric-a-Brac, Tramtrack, Broad Complex BTB domain with non-phototropic hypocotyl 3 NPH3 and coiled-coil domains, expressed
LOC_Os12g17790	chr12	hypothetical protein
LOC_Os12g24840	chr12	retrotransposon protein, putative, Ty3-gypsy subclass
LOC_Os03g42120	chr3	Putative uncharacterized protein//hypothetical protein
LOC_Os10g41999	chr10	Conserved hypothetical protein.//Os10g0569500//RALFL27 - Rapid ALkalinization Factor RALF family protein precursor, expressed
LOC_Os12g17470	chr12	retrotransposon protein, putative, unclassified
LOC_Os05g21190	chr5	retrotransposon, putative, centromere-specific
LOC_Os04g21580	chr4	retrotransposon protein, putative, unclassified, expressed
LOC_Os01g16310	chr1	glycosyl hydrolase, family 31, putative, expressed
LOC_Os01g25040	chr1	transposon protein, putative, CACTA, En/Spm sub-class
LOC_Os05g10300	chr5	hypothetical protein
LOC_Os05g36060	chr5	transposon protein, putative, unclassified
LOC_Os09g09420	chr9	transposon protein, putative, CACTA, En/Spm sub-class
LOC_Os09g11140	chr9	hypothetical protein
LOC_Os05g01850	chr5	transposon protein, putative, unclassified
LOC_Os12g15880	chr12	retrotransposon protein, putative, unclassified
LOC_Os12g14670	chr12	hypothetical protein
LOC_Os12g17450	chr12	Retrotransposon protein, putative, Ty3-gypsy subclass//retrotransposon protein, putative, unclassified
LOC_Os12g15800	chr12	retrotransposon protein, putative, unclassified
LOC_Os09g14180	chr9	retrotransposon protein, putative, unclassified
LOC_Os09g38870	chr9	conserved hypothetical protein
LOC_Os05g05354	chr5	PDZ/DHR/GLGF domain containing protein.//Os05g0146100//Os05g0146100 protein//expressed protein
LOC_Os01g07140	chr1	Similar to KEAP1.//Kelch-type beta propeller domain containing protein.//Os01g0165200//kelch repeat-containing protein, putative, expressed
LOC_Os12g15610	chr12	hypothetical protein
LOC_Os06g37990	chr6	retrotransposon protein, putative, Ty3-gypsy subclass
LOC_Os09g09860	chr9	retrotransposon protein, putative, Ty3-gypsy subclass
LOC_Os01g24330	chr1	retrotransposon protein, putative, unclassified
LOC_Os03g58170	chr3	Hypothetical conserved gene.//Similar to Ripening-associated protein (Fragment).//Os03g0796000//stem-specific protein TSJT1, putative, expressed
LOC_Os09g15090	chr9	transposon protein, putative, CACTA, En/Spm sub-class
LOC_Os12g25200	chr12	Similar to Chloride channel protein CLC-a (AtCLC-a).//Os12g0438600//Os12g0438600 protein//chloride transporter, chloride channel family, putative, expressed
LOC_Os12g01790	chr12	Retrotransposon protein, putative, Ty1-copia subclass//retrotransposon protein, putative, unclassified
LOC_Os12g01800	chr12	Similar to DRM-type DNA-methyltransferase.//Os12g0108900//Os12g0108900 protein//DNA cytosine methyltransferase Zmet3, putative
LOC_Os09g26500	chr9	CXE carboxylesterase, putative, expressed
LOC_Os01g26080	chr1	hypothetical protein
LOC_Os09g14630	chr9	retrotransposon protein, putative, unclassified
LOC_Os01g46169	chr1	Hypothetical conserved gene.//Similar to esterase.//Lipase, GDSL domain containing protein.//Os01g0650200//Os01g0650200 protein//GDSL-like lipase/acylhydrolase, putative, expressed
LOC_Os06g37080	chr6	Cupredoxin domain containing protein.//Os06g0567200//Os06g0567200 protein//L-ascorbate oxidase precursor, putative, expressed
LOC_Os12g22650	chr12	Similar to Histone H3.//Os12g0415400//Histone H3//histone H3, putative, expressed
LOC_Os03g03830	chr3	EF hand domain containing protein.//Similar to ESTs AU031435(E61570).//Os03g0130500//Os03g0130500 protein//EF hand family protein, putative, expressed
LOC_Os12g14520	chr12	expressed protein
LOC_Os12g08010	chr12	hypothetical protein
LOC_Os10g01710	chr10	hypothetical protein
LOC_Os05g26160	chr5	retrotransposon protein, putative, Ty3-gypsy subclass
LOC_Os06g44680	chr6	hypothetical protein
LOC_Os01g37160	chr1	retrotransposon protein, putative, unclassified
LOC_Os10g02470	chr10	Aldo/keto reductase, putative//deoxymugineic acid synthase1, putative
LOC_Os01g36370	chr1	transposon protein, putative, unclassified
LOC_Os09g14620	chr9	retrotransposon protein, putative, unclassified
LOC_Os01g18400	chr1	Similar to Seed chitinase-c.//Os01g0287600//Chitinase 10//CHIT10 - Chitinase family protein precursor, expressed
LOC_Os01g41420	chr1	Amino acid transporter, transmembrane domain containing protein.//Os01g0597600//Os01g0597600 protein//transmembrane amino acid transporter protein, putative, expressed
LOC_Os06g06480	chr6	Hypothetical conserved gene.//Os06g0159750//Histone H3//Core histone H2A/H2B/H3/H4 domain containing protein, putative, expressed
LOC_Os01g47510	chr1	retrotransposon protein, putative, unclassified
LOC_Os11g20384	chr11	Similar to predicted protein.//Synaptojanin, N-terminal domain containing protein.//Os11g0309000//SacI homology domain containing protein, expressed
LOC_Os01g27440	chr1	retrotransposon protein, putative, unclassified
LOC_Os07g23270	chr7	transposon protein, putative, CACTA, En/Spm sub-class
LOC_Os03g64170	chr3	Similar to anther-specific proline-rich protein APG.//Esterase, SGNH hydrolase-type domain containing protein.//Os03g0859100//Os03g0859100 protein//GDSL-like lipase/acylhydrolase, putative, expressed
LOC_Os02g55200	chr2	Zinc finger, RING/FYVE/PHD-type domain containing protein.//Os02g0795300//Os02g0795300 protein//expressed protein
LOC_Os05g09736	chr5	retrotransposon protein, putative, Ty1-copia subclass
LOC_Os03g61390	chr3	retrotransposon protein, putative, unclassified
LOC_Os12g20450	chr12	Retrotransposon protein, putative, Ty3-gypsy subclass//retrotransposon protein, putative, Ty3-gypsy subclass
LOC_Os07g01190	chr7	hypothetical protein
LOC_Os10g03890	chr10	Conserved hypothetical protein.//Os10g0128400
LOC_Os01g55974	chr1	Similar to deoxycytidylate deaminase.//Similar to Deoxycytidylate deaminase (EC 3.5.4.12) (dCMP deaminase).//Os01g0765000//Os01g0765000 protein//deoxycytidylate deaminase, putative, expressed
LOC_Os01g73170	chr1	Similar to Peroxidase 12 precursor (EC 1.11.1.7) (Atperox P12) (PRXR6) (ATP4a).//Os01g0962700//Os01g0962700 protein//peroxidase precursor, putative, expressed
LOC_Os12g23260	chr12	hypothetical protein
LOC_Os12g04800	chr12	retrotransposon protein, putative, Ty3-gypsy subclass
LOC_Os10g25910	chr10	transposon protein, putative, CACTA, En/Spm sub-class
LOC_Os01g58920	chr1	retrotransposon protein, putative, Ty3-gypsy subclass
LOC_Os12g34094	chr12	NADH-ubiquinone oxidoreductase chain 4, putative
LOC_Os04g23500	chr4	hypothetical protein
LOC_Os06g10109	chr6	Conserved hypothetical protein.//Os06g0202300//expressed protein
LOC_Os06g09230	chr6	Similar to Serine threonine kinase.//Os06g0191900//Os06g0191900 protein//serine threonine kinase, putative, expressed
LOC_Os07g04880	chr7	retrotransposon protein, putative, unclassified
LOC_Os10g04210	chr10	Putative uncharacterized protein//hypothetical protein
LOC_Os12g23890	chr12	expressed protein
LOC_Os04g05920	chr4	transposon protein, putative, CACTA, En/Spm sub-class
LOC_Os06g17850	chr6	hypothetical protein
LOC_Os05g43070	chr5	Os05g0506400//hypothetical protein
LOC_Os12g09380	chr12	hypothetical protein
